# Supplementary material for: The SIRT3 and SIRT6 Promote Prostate Cancer Progression by Inhibiting Necroptosis‐Mediated Innate Immune Response
Source: Hindawi journal article supplement (doi:10.1155/2020/8820355), 2020-01-01
Supplement: f1 [file 8820355.f1.pdf]

Figure S1

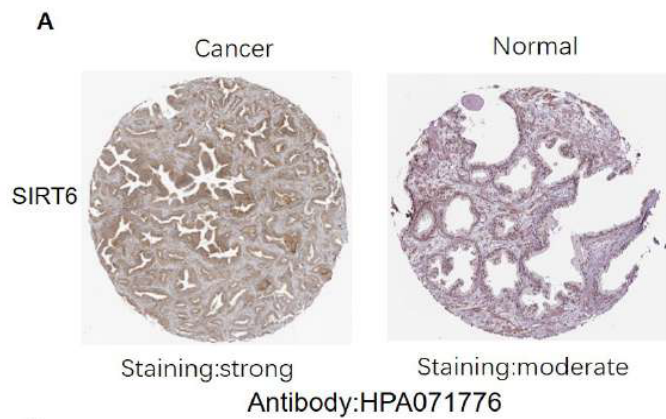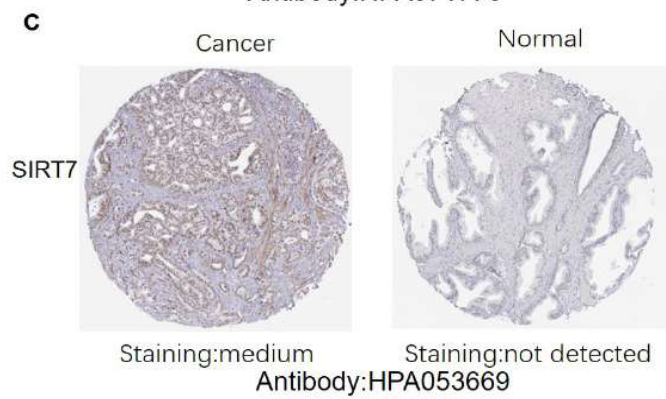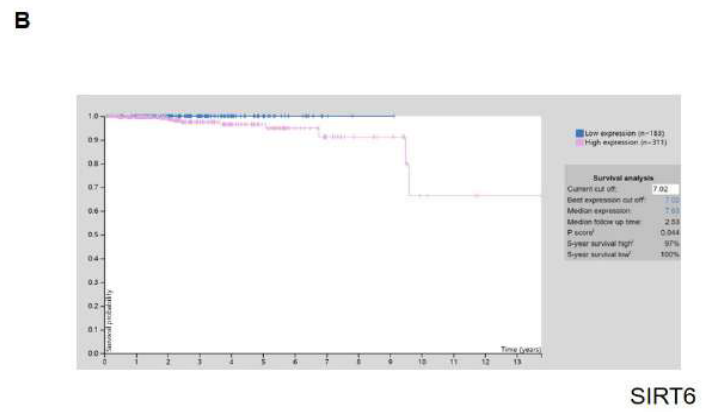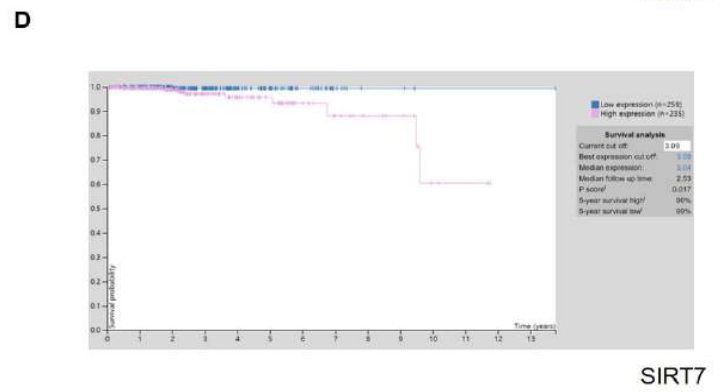

Figure S2

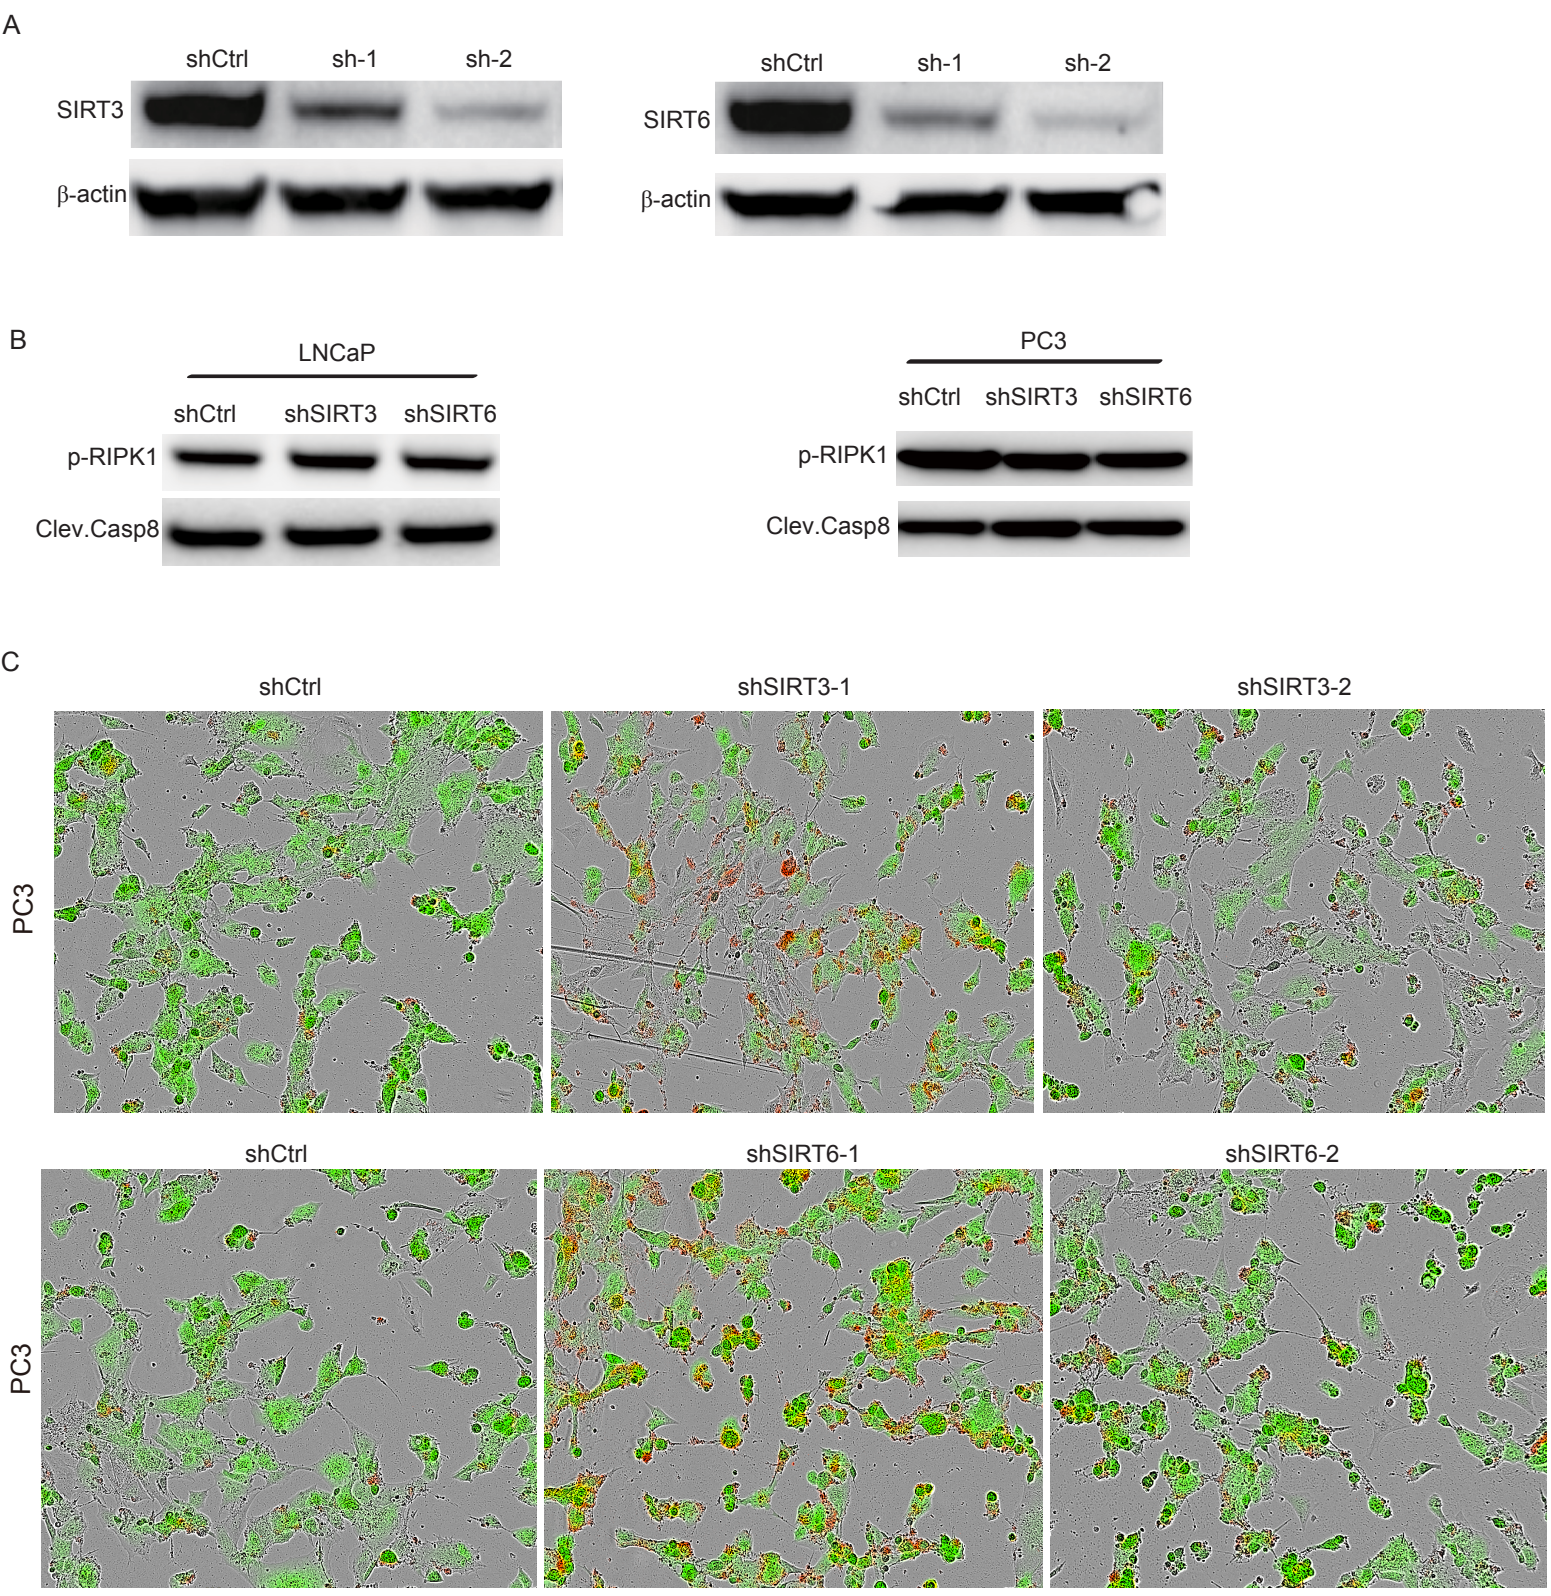

**Supplementary Table 1. Basic characteristics of prostate cancer patients**

| <b>Variables</b>                        | <b>PCa patients (n=499)</b> |
|-----------------------------------------|-----------------------------|
| Age (years, Mean±SD)                    | 61.01±6.81                  |
| Gleason scores                          |                             |
| <7                                      | N=45                        |
| 7                                       | N=246                       |
| >7                                      | N=208                       |
| Tumor stage                             |                             |
| ≤T2b                                    | N=23                        |
| >T2b                                    | N=469                       |
| Pathology_N_stage                       |                             |
| N0                                      | N=347                       |
| N1                                      | N=79                        |
| PSA_value                               |                             |
| ≥0.2                                    | N=98                        |
| <0.2                                    | N=344                       |
| Histological_type                       |                             |
| Acinar type                             | N=484                       |
| Other type                              | N=15                        |
| Amounts of gene expression<br>(Mean±SD) |                             |
| SIRT1                                   | 663.87±217.47               |
| SIRT2                                   | 1236.27±311.70              |
| SIRT3                                   | 839.09±266.10               |
| SIRT4                                   | 28.16±12.72                 |
| SIRT5                                   | 371.95±78.24                |
| SIRT6                                   | 412.29±180.96               |
| SIRT7                                   | 329.37±117.14               |

Abbreviation: PCa: prostate cancer.

**Supplementary Table 2. Univariate analysis of overall survival in prostate cancer patients.**

| Variables         | Univariate analysis |              |         |
|-------------------|---------------------|--------------|---------|
|                   | Hazard ratio        | 95% CI       | P value |
| Age (years)       | 1.039               | 1.006-1.074  | 0.020   |
| Gleason scores    | 1.629               | 1.329-1.997  | <0.001  |
| Tumor stage       | 2.675               | 0.657-10.889 | 0.170   |
| Pathology_N_stage | 1.693               | 1.051-2.726  | 0.030   |
| Histological_type | 0.538               | 0.196-1.474  | 0.228   |
| SIRT1             | 1.000               | 0.999-1.001  | 0.578   |
| SIRT2             | 0.999               | 0.999-1.000  | 0.158   |
| SIRT3             | 0.999               | 0.998-1.000  | 0.014   |
| SIRT4             | 0.999               | 0.982-1.015  | 0.869   |
| SIRT5             | 0.998               | 0.995-1.001  | 0.156   |
| SIRT6             | 0.999               | 0.997-1.000  | 0.037   |
| SIRT7             | 1.000               | 0.998-1.002  | 0.972   |

**Supplementary Table 3. Multivariate analysis of overall survival in prostate cancer patients.**

| Variables         | Multivariate analysis |             |         |
|-------------------|-----------------------|-------------|---------|
|                   | Hazard ratio          | 95% CI      | P value |
| Age (years)       | 1.023                 | 0.990-1.056 | 0.182   |
| Gleason scores    | 1.437                 | 1.140-1.810 | 0.002   |
| Tumor stage       | 1.513                 | 0.364-6.296 | 0.569   |
| Pathology_N_stage | 1.260                 | 0.757-2.095 | 0.374   |
| Histological_type | 0.627                 | 0.193-2.034 | 0.627   |
| SIRT1             | 1.001                 | 0.999-1.002 | 0.325   |



**Supplementary Table 4. Multivariate analysis of overall survival in prostate cancer patients.**

| Variables         | Multivariate analysis |             |                |
|-------------------|-----------------------|-------------|----------------|
|                   | Hazard ratio          | 95% CI      | <i>P</i> value |
| Age (years)       | 1.022                 | 0.989-1.057 | 0.184          |
| Gleason scores    | 1.433                 | 1.137-1.807 | <b>0.002</b>   |
| Tumor stage       | 1.485                 | 0.358-6.158 | 0.586          |
| Pathology_N_stage | 1.214                 | 0.728-2.025 | 0.458          |
| Histological_type | 0.509                 | 0.149-1.737 | 0.281          |
| SIRT2             | 0.999                 | 0.999-1.000 | 0.180          |

**Supplementary Table 5. Multivariate analysis of overall survival in prostate cancer patients.**

| Variables         | Multivariate analysis |             |                |
|-------------------|-----------------------|-------------|----------------|
|                   | Hazard ratio          | 95% CI      | <i>P</i> value |
| Age (years)       | 1.020                 | 0.988-1.053 | 0.227          |
| Gleason scores    | 1.433                 | 1.138-1.806 | <b>0.002</b>   |
| Tumor stage       | 1.376                 | 0.332-5.712 | 0.660          |
| Pathology_N_stage | 1.263                 | 0.761-2.097 | 0.367          |
| Histological_type | 0.408                 | 0.122-1.364 | 0.146          |
| SIRT3             | 0.998                 | 0.997-0.999 | <b>0.003</b>   |

**Supplementary Table 6. Multivariate analysis of overall survival in prostate cancer patients.**

| Variables         | Multivariate analysis |             |                |
|-------------------|-----------------------|-------------|----------------|
|                   | Hazard ratio          | 95% CI      | <i>P</i> value |
| Age (years)       | 1.023                 | 0.990-1.057 | 0.181          |
| Gleason scores    | 1.441                 | 1.145-1.815 | <b>0.002</b>   |
| Tumor stage       | 1.463                 | 0.352-6.083 | 0.601          |
| Pathology_N_stage | 1.262                 | 0.759-2.098 | 0.370          |
| Histological_type | 0.685                 | 0.213-2.204 | 0.526          |
| SIRT4             | 0.999                 | 0.983-1.016 | 0.939          |

**Supplementary Table 7. Multivariate analysis of overall survival in prostate cancer patients.**

| Variables         | Multivariate analysis |             |                |
|-------------------|-----------------------|-------------|----------------|
|                   | Hazard ratio          | 95% CI      | <i>P</i> value |
| Age (years)       | 1.021                 | 0.988-1.055 | 0.223          |
| Gleason scores    | 1.443                 | 1.146-1.818 | <b>0.002</b>   |
| Tumor stage       | 1.465                 | 0.353-6.078 | 0.599          |
| Pathology_N_stage | 1.217                 | 0.731-2.208 | 0.451          |
| Histological_type | 0.599                 | 0.183-1.957 | 0.396          |
| SIRT5             | 0.998                 | 0.996-1.001 | 0.236          |

**Supplementary Table 8. Multivariate analysis of overall survival in prostate cancer patients.**

| Variables         | Multivariate analysis |             |                |
|-------------------|-----------------------|-------------|----------------|
|                   | Hazard ratio          | 95% CI      | <i>P</i> value |
| Age (years)       | 1.022                 | 0.989-1.055 | 0.191          |
| Gleason scores    | 1.444                 | 1.145-1.822 | <b>0.002</b>   |
| Tumor stage       | 1.480                 | 0.357-6.135 | 0.589          |
| Pathology_N_stage | 1.279                 | 0.770-2.124 | 0.342          |
| Histological_type | 0.415                 | 0.125-1.376 | 0.150          |
| SIRT6             | 0.998                 | 0.997-0.999 | <b>0.007</b>   |

**Supplementary Table 9. Multivariate analysis of overall survival in prostate cancer patients.**

| Variables                | Multivariate analysis |             |                |
|--------------------------|-----------------------|-------------|----------------|
|                          | Hazard ratio          | 95% CI      | <i>P</i> value |
| Age (years)              | 1.023                 | 0.990-1.057 | 0.169          |
| Gleason scores           | 1.465                 | 1.162-1.846 | <b>0.001</b>   |
| Tumor stage <sup>a</sup> | 1.442                 | 0.347-5.990 | 0.614          |
| Pathology_N_stage        | 1.278                 | 0.768-2.127 | 0.346          |
| Histological_type        | 0.511                 | 0.151-1.734 | 0.281          |
| SIRT7                    | 0.999                 | 0.997-1.001 | 0.153          |
